# Supplementary material for: Limited Changes in Lifestyle Behaviours after Non-Muscle Invasive Bladder Cancer Diagnosis
Source: MDPI journal article supplement (doi:10.3390/cancers14040960), 2022-02-15
Supplement: s1 [file s1]

Supplementary materials

# Limited Changes in Lifestyle Behaviours after Non-Muscle Invasive Bladder Cancer Diagnosis

Ivy Beeren, Liesbeth de Goeij, Rana Dandis, Nikoletta Vidra, Moniek van Zutphen, J. Alfred Witjes, Ellen Kampman, Lambertus A.L.M. Kiemeney, and Alina Vrieling

**Table S1.** Model-specific adequacy assessments of latent trajectory class models

| Number of groups <sup>a</sup>                                | BIC   | AIC   | Entropy | Proportions per group (%) |    |    |    |    |    |   |
|--------------------------------------------------------------|-------|-------|---------|---------------------------|----|----|----|----|----|---|
|                                                              |       |       |         | 1                         | 2  | 3  | 4  | 5  | 6  | 7 |
| WCRF/AICR score (0-7), n=935                                 |       |       |         |                           |    |    |    |    |    |   |
| 1 (selected)                                                 | 5896  | 5847  | 1.00    | 100                       |    |    |    |    |    |   |
| 2                                                            | 5898  | 5825  | 0.26    | 29                        | 71 |    |    |    |    |   |
| 3                                                            | 5919  | 5822  | 0.64    | 7                         | 5  | 88 |    |    |    |   |
| 4                                                            | 5950  | 5829  | 0.39    | 16                        | 31 | 21 | 32 |    |    |   |
| 5                                                            | 5974  | 5829  | 0.54    | 36                        | 2  | 17 | 9  | 35 |    |   |
| 6                                                            | 5987  | 5818  | 0.56    | 23                        | 7  | 23 | 11 | 3  | 33 |   |
| 7                                                            | 6037  | 5843  | 0.47    | 9                         | 10 | 12 | 13 | 7  | 43 | 6 |
| Body mass index (kg/m²), n=960                               |       |       |         |                           |    |    |    |    |    |   |
| 1                                                            | 9684  | 9635  | 1.00    | 100                       |    |    |    |    |    |   |
| 2 (selected)                                                 | 9126  | 9053  | 0.61    | 79                        | 21 |    |    |    |    |   |
| 3                                                            | 9098  | 9001  | 0.55    | 41                        | 56 | 3  |    |    |    |   |
| 4                                                            | 9038  | 8916  | 0.66    | 2                         | 29 | 63 | 6  |    |    |   |
| 5                                                            | 9030  | 8884  | 0.69    | 2                         | 27 | 4  | 61 | 6  |    |   |
| 6                                                            | 9090  | 8920  | 0.70    | 1                         | 0  | 10 | 74 | 4  | 11 |   |
| 7                                                            | 9106  | 8911  | 0.67    | 2                         | 29 | 0  | 60 | 1  | 2  | 6 |
| Moderate-to-vigorous physical activity (minutes/week), n=960 |       |       |         |                           |    |    |    |    |    |   |
| 1                                                            | 39520 | 39461 | 1.00    | 100                       |    |    |    |    |    |   |
| 2                                                            | 39181 | 39098 | 0.78    | 82                        | 18 |    |    |    |    |   |

|                                                      |       |       |      |     |     |    |    |    |    |    |  |
|------------------------------------------------------|-------|-------|------|-----|-----|----|----|----|----|----|--|
| 3                                                    | 39170 | 39073 | 0.60 | 45  | 35  | 20 |    |    |    |    |  |
| 4 (selected)                                         | 39166 | 39035 | 0.54 | 17  | 33  | 35 | 15 |    |    |    |  |
| 5                                                    | 39175 | 39019 | 0.58 | 16  | 23  | 24 | 23 | 14 |    |    |  |
| 6                                                    | 39187 | 39007 | 0.61 | 14  | 8   | 25 | 23 | 16 | 14 |    |  |
| 7                                                    | 39297 | 39093 | 0.55 | 10  | 15  | 18 | 13 | 16 | 11 | 17 |  |
| <b>Dietary fibre intake (g/day), n=949</b>           |       |       |      |     |     |    |    |    |    |    |  |
| 1                                                    | 17343 | 17294 | 1.00 | 100 |     |    |    |    |    |    |  |
| 2 (selected)                                         | 16982 | 16909 | 0.67 | 89  | 11  |    |    |    |    |    |  |
| 3                                                    | 16955 | 16858 | 0.54 | 2   | 59  | 39 |    |    |    |    |  |
| 4                                                    | 16966 | 16844 | 0.56 | 19  | 67  | 13 | 1  |    |    |    |  |
| 5                                                    | 16988 | 16842 | 0.67 | 36  | 4   | 54 | 4  | 2  |    |    |  |
| 6                                                    | 17049 | 16893 | 0.64 | 1   | 13  | 28 | 51 | 5  | 2  |    |  |
| 7                                                    | 17024 | 16829 | 0.55 | 1   | 16  | 22 | 5  | 10 | 8  | 38 |  |
| <b>Fruit and vegetables intake (g/day), n=949</b>    |       |       |      |     |     |    |    |    |    |    |  |
| 1                                                    | 33373 | 33324 | 1.00 | 100 |     |    |    |    |    |    |  |
| 2                                                    | 32989 | 32916 | 0.54 | 65  | 35  |    |    |    |    |    |  |
| 3 (selected)                                         | 32855 | 32758 | 0.65 | 5   | 59  | 36 |    |    |    |    |  |
| 4                                                    | 32876 | 32755 | 0.72 | 4   | 55  | 1  | 40 |    |    |    |  |
| 5                                                    | 32834 | 32689 | 0.72 | 2   | 48  | 34 | 1  | 15 |    |    |  |
| 6                                                    | 32836 | 32666 | 0.70 | 0   | 6   | 42 | 15 | 1  | 36 |    |  |
| 7                                                    | 32897 | 32703 | 0.76 | 1   | 2   | 47 | 34 | 0  | 1  | 15 |  |
| <b>Ultra-processed food intake (en%), n=949</b>      |       |       |      |     |     |    |    |    |    |    |  |
| 1                                                    | 19281 | 19232 | 1.00 | 100 |     |    |    |    |    |    |  |
| 2 (selected)                                         | 19243 | 19170 | 0.47 | 91  | 9   |    |    |    |    |    |  |
| 3                                                    | 19217 | 19120 | 0.49 | 1   | 61  | 39 |    |    |    |    |  |
| 4                                                    | 19223 | 19101 | 0.51 | 48  | 36  | 15 | 0  |    |    |    |  |
| 5                                                    | 19255 | 19109 | 0.56 | 53  | 29  | 16 | 2  | 0  |    |    |  |
| 6                                                    | 19278 | 19108 | 0.59 | 10  | 0   | 46 | 13 | 4  | 27 |    |  |
| 7                                                    | 19316 | 19121 | 0.63 | 39  | 0   | 24 | 22 | 4  | 2  | 8  |  |
| <b>Red and processed meat intake (g/week), n=949</b> |       |       |      |     |     |    |    |    |    |    |  |
| 1                                                    | 38132 | 38084 | 1.00 | 100 |     |    |    |    |    |    |  |
| 2                                                    | 38166 | 38094 | 1.00 | 0   | 100 |    |    |    |    |    |  |

|                                            |       |       |      |     |    |    |    |    |    |    |  |
|--------------------------------------------|-------|-------|------|-----|----|----|----|----|----|----|--|
| 3 (selected)                               | 37766 | 37668 | 0.73 | 81  | 14 | 5  |    |    |    |    |  |
| 4                                          | 37906 | 37785 | 0.78 | 1   | 14 | 0  | 85 |    |    |    |  |
| 5                                          | 37982 | 37837 | 0.84 | 8   | 0  | 0  | 90 | 2  |    |    |  |
| 6                                          | 37744 | 37574 | 0.70 | 5   | 7  | 1  | 1  | 53 | 33 |    |  |
| 7                                          | 37851 | 37657 | 0.74 | 1   | 2  | 5  | 48 | 0  | 1  | 43 |  |
| <b>Sugary drinks intake (g/day), n=949</b> |       |       |      |     |    |    |    |    |    |    |  |
| 1                                          | 31588 | 31530 | 1.00 | 100 |    |    |    |    |    |    |  |
| 2                                          | 31133 | 31051 | 0.72 | 55  | 45 |    |    |    |    |    |  |
| 3 (selected)                               | 31029 | 30923 | 0.79 | 58  | 6  | 36 |    |    |    |    |  |
| 4                                          | 30984 | 30853 | 0.71 | 6   | 36 | 25 | 33 |    |    |    |  |
| 5                                          | 30820 | 30665 | 0.81 | 6   | 16 | 33 | 24 | 21 |    |    |  |
| 6                                          | 30750 | 30571 | 0.79 | 6   | 13 | 30 | 16 | 24 | 11 |    |  |
| 7                                          | 31059 | 30855 | 0.67 | 14  | 14 | 19 | 17 | 6  | 10 | 20 |  |
| <b>Alcohol intake (g/day), n=949</b>       |       |       |      |     |    |    |    |    |    |    |  |
| 1                                          | 17455 | 17397 | 1.00 | 100 |    |    |    |    |    |    |  |
| 2                                          | 16835 | 16752 | 0.69 | 53  | 47 |    |    |    |    |    |  |
| 3                                          | 16809 | 16703 | 0.71 | 38  | 20 | 42 |    |    |    |    |  |
| 4 (selected)                               | 15124 | 14993 | 0.75 | 16  | 54 | 18 | 12 |    |    |    |  |
| 5                                          | 15207 | 15052 | 0.74 | 28  | 33 | 14 | 13 | 12 |    |    |  |
| 6                                          | 16116 | 15936 | 0.79 | 5   | 59 | 11 | 2  | 15 | 8  |    |  |
| 7                                          | 15338 | 15135 | 0.79 | 13  | 35 | 6  | 24 | 9  | 1  | 12 |  |

Abbreviations: AIC, Akaike information criterion; BIC, Bayesian information criterion; g, grams; kg, kilograms; m, meter; WCRF/AICR, World Cancer Research Fund/American Institute for Cancer Research.

<sup>a</sup> Models with the lowest BIC value and with all groups including  $\geq 5\%$  of the total study population were favoured. When those criteria were both met and another model was selected, this is due to overlapping curves and/or confidence intervals of trajectory groups.

**Table S2.** Group-specific adequacy assessments of latent trajectory class models

| Group                                                               | Proportion (%) | AvePP <sup>a</sup> | OCC <sup>b</sup> |
|---------------------------------------------------------------------|----------------|--------------------|------------------|
| <b>WCRF/AICR score (0-7), n=935</b>                                 |                |                    |                  |
| Medium maintainers                                                  | 100            | n.a.               | n.a.             |
| <b>Body mass index (kg/m<sup>2</sup>), n=960</b>                    |                |                    |                  |
| High maintainers                                                    | 79             | 0.90               | 3.2              |
| Medium maintainers                                                  | 21             | 0.86               | 16.1             |
| <b>Moderate-to-vigorous physical activity (minutes/week), n=961</b> |                |                    |                  |
| High increasers                                                     | 17             | 0.70               | 6.9              |
| High decreasers                                                     | 33             | 0.69               | 5.9              |
| Medium maintainers                                                  | 35             | 0.72               | 5.8              |
| Medium decreasers                                                   | 15             | 0.94               | 77.5             |
| <b>Fruit and vegetables intake (g/day), n=949</b>                   |                |                    |                  |
| High decreasers                                                     | 5              | 0.82               | 60.9             |
| Medium decreasers                                                   | 59             | 0.87               | 4.8              |
| Low maintainers                                                     | 36             | 0.80               | 7.9              |
| <b>Dietary fibre intake (g/day), n=949</b>                          |                |                    |                  |
| High decreasers                                                     | 11             | 0.87               | 34.6             |
| Medium maintainers                                                  | 89             | 0.93               | 2.5              |
| <b>Ultra-processed food intake (en%), n=949</b>                     |                |                    |                  |
| High increasers                                                     | 9              | 0.75               | 13.1             |
| Medium increasers                                                   | 91             | 0.89               | 1.5              |
| <b>Red and processed meat intake (g/week), n=949</b>                |                |                    |                  |
| High decreasers                                                     | 14             | 0.84               | 20.6             |
| Medium maintainers                                                  | 81             | 0.90               | 2.8              |
| Low maintainers                                                     | 5              | 0.87               | 133.1            |
| <b>Sugary drinks intake (g/day), n=949</b>                          |                |                    |                  |
| High decreasers                                                     | 58             | 0.90               | 7.4              |
| Medium decreasers                                                   | 6              | 0.89               | 110.6            |
| Low increasers                                                      | 36             | 0.93               | 20.9             |
| <b>Alcohol intake (g/day), n=949</b>                                |                |                    |                  |
| High decreasers                                                     | 54             | 0.90               | 8.4              |

---

|                  |    |      |         |
|------------------|----|------|---------|
| Medium decrease  | 18 | 0.82 | 15.9    |
| Low maintainers  | 16 | 0.67 | 11.0    |
| Zero maintainers | 12 | 1.00 | 25638.3 |

---

Abbreviations: AvePP, average posterior probability; OCC, odds of correct classification; WCRF/AICR, World Cancer Research Fund/American Institute for Cancer Research.

<sup>a</sup> The closer the AvePP are to 1, the better the model fit. An AvePP greater than 0.7 for all groups is generally recommended.

<sup>b</sup> The higher the OCC value, the better the model fit. An OCC value greater than 5.0 for all groups is generally recommended.

**Table S3.** Multivariable multinomial logistic regression of correlates of body mass index trajectories (n=960)

| Correlates                            | High maintainers<br>n=200 | Medium maintainers<br>n=760 |            |
|---------------------------------------|---------------------------|-----------------------------|------------|
|                                       |                           | OR                          | 95% CI     |
| Age (ref = 65+)                       | Ref                       | 0.85                        | 0.59, 1.24 |
| Gender (ref = male)                   | Ref                       | 0.89                        | 0.60, 1.32 |
| Education (ref = low) <sup>b</sup>    |                           |                             |            |
| Medium                                | Ref                       | 0.96                        | 0.66, 1.41 |
| High                                  | Ref                       | 1.24                        | 0.82, 1.88 |
| Living situation (ref = with partner) |                           |                             |            |
| With partner and kids                 | Ref                       | 0.84                        | 0.50, 1.41 |
| Alone with or without kids            | Ref                       | 0.76                        | 0.48, 1.18 |
| Smoking (ref = never)                 |                           |                             |            |
| Current                               | Ref                       | 0.72                        | 0.43, 1.20 |
| Former                                | Ref                       | 0.85                        | 0.54, 1.35 |
| Tumour stage (ref = Ta)               |                           |                             |            |
| Tis or T1                             | Ref                       | 0.81                        | 0.56, 1.16 |
| Comorbidities (ref = 0)               |                           |                             |            |
| 1                                     | Ref                       | 0.77                        | 0.44, 1.34 |
| ≥2                                    | Ref                       | 0.64                        | 0.39, 1.05 |

Abbreviations: CI, confidence interval; ref, reference; OR, odds ratio.

<sup>a</sup> Bold indicates significant results ( $p < 0.05$ ).

<sup>b</sup> Low: primary, secondary, and vocational education, medium: intermediate vocational education and higher general secondary education, high: higher vocational education and university.

**Table S4.** Multivariable multinomial logistic regression of correlates of moderate-to-vigorous physical activity (n=961)

| Correlates                                           | Medium decrease<br>n=145 | High increase<br>n=159 <sup>a</sup> |                   | High decrease<br>n=317 <sup>a</sup> |                   | Medium maintainers<br>n=340 <sup>a</sup> |                   |
|------------------------------------------------------|--------------------------|-------------------------------------|-------------------|-------------------------------------|-------------------|------------------------------------------|-------------------|
|                                                      |                          | OR                                  | 95% CI            | OR                                  | 95% CI            | OR                                       | 95% CI            |
| Age (ref = 65+)                                      | Ref                      | 1.18                                | 0.66, 2.11        | 1.31                                | 0.79, 2.20        | <b>1.81</b>                              | <b>1.11, 2.96</b> |
| Gender (ref = male)                                  | Ref                      | <b>0.27</b>                         | <b>0.15, 0.51</b> | <b>0.33</b>                         | <b>0.20, 0.55</b> | 0.70                                     | 0.44, 1.11        |
| Education (ref = low) <sup>b</sup>                   |                          |                                     |                   |                                     |                   |                                          |                   |
| Medium                                               | Ref                      | 1.36                                | 0.75, 2.48        | <b>1.81</b>                         | <b>1.06, 3.11</b> | <b>1.75</b>                              | <b>1.03, 2.96</b> |
| High                                                 | Ref                      | 1.12                                | 0.59, 2.10        | <b>1.84</b>                         | <b>1.06, 3.18</b> | 1.67                                     | 0.97, 2.87        |
| Living situation (ref = with partner)                |                          |                                     |                   |                                     |                   |                                          |                   |
| With partner and kids                                | Ref                      | 0.59                                | 0.23, 1.53        | 0.87                                | 0.39, 1.92        | 1.42                                     | 0.68, 2.98        |
| Alone with or without kids                           | Ref                      | <b>0.45</b>                         | <b>0.23, 0.88</b> | <b>0.36</b>                         | <b>0.20, 0.64</b> | 0.70                                     | 0.42, 1.18        |
| Body mass index (ref = normal weight) <sup>c,d</sup> |                          |                                     |                   |                                     |                   |                                          |                   |
| Overweight                                           | Ref                      | 1.02                                | 0.59, 1.78        | 1.00                                | 0.61, 1.62        | 1.04                                     | 0.64, 1.69        |
| Obese                                                | Ref                      | 0.68                                | 0.35, 1.34        | <b>0.45</b>                         | <b>0.25, 0.83</b> | 0.80                                     | 0.45, 1.42        |
| Smoking (ref = never)                                |                          |                                     |                   |                                     |                   |                                          |                   |
| Current                                              | Ref                      | 0.56                                | 0.26, 1.25        | <b>0.49</b>                         | <b>0.24, 0.99</b> | <b>0.44</b>                              | <b>0.23, 0.85</b> |
| Former                                               | Ref                      | 1.00                                | 0.49, 2.04        | 1.16                                | 0.62, 2.18        | 0.60                                     | 0.33, 1.09        |
| Tumour stage (ref = Ta)                              |                          |                                     |                   |                                     |                   |                                          |                   |
| Tis or T1                                            | Ref                      | <b>0.52</b>                         | <b>0.30, 0.89</b> | <b>0.56</b>                         | <b>0.35, 0.89</b> | <b>0.61</b>                              | <b>0.39, 0.97</b> |
| Comorbidities (ref = 0)                              |                          |                                     |                   |                                     |                   |                                          |                   |
| 1                                                    | Ref                      | 1.11                                | 0.50, 2.50        | 1.42                                | 0.68, 2.93        | 1.32                                     | 0.65, 2.66        |
| ≥2                                                   | Ref                      | 0.82                                | 0.40, 1.66        | 0.98                                | 0.52, 1.86        | 0.82                                     | 0.45, 1.51        |

Abbreviations: CI, confidence interval; ref, reference; OR, odds ratio.

<sup>a</sup> Bold indicates significant results (p < 0.05).

<sup>b</sup> Low: primary, secondary, and vocational education, medium: intermediate vocational education and higher general secondary education, high: higher vocational education and university.

<sup>c</sup> Normal weight: body mass index <24.9 kg/m<sup>2</sup>, overweight: body mass index 25.0–29.9 kg/m<sup>2</sup>, obese: body mass index ≥30.0 kg/m<sup>2</sup>.

<sup>d</sup> n=8 participants were included with body mass index <18.5 kg/m<sup>2</sup>.

**Table S5.** Multivariable multinomial logistic regression of correlates of fruit and vegetables intake trajectories (n=949)

| Correlates                                           | Low maintainers<br>n=345 | High decreaseers<br>n=50 <sup>a</sup> |                   | Medium decreaseers<br>n=554 <sup>a</sup> |                   |
|------------------------------------------------------|--------------------------|---------------------------------------|-------------------|------------------------------------------|-------------------|
|                                                      |                          | OR                                    | 95% CI            | OR                                       | 95% CI            |
| Age (ref = 65+)                                      | Ref                      | 0.49                                  | 0.22, 1.08        | 0.90                                     | 0.64, 1.26        |
| Gender (ref = male)                                  | Ref                      | 2.13                                  | 1.00, 4.55        | 1.55                                     | 1.07, 2.26        |
| Education (ref = low) <sup>b</sup>                   | Ref                      |                                       |                   |                                          |                   |
| Medium                                               | Ref                      | <b>2.34</b>                           | <b>1.08, 5.06</b> | 1.12                                     | 0.80, 1.59        |
| High                                                 | Ref                      | <b>2.79</b>                           | <b>1.31, 5.93</b> | 1.03                                     | 0.72, 1.48        |
| Living situation (ref = with partner)                | Ref                      |                                       |                   |                                          |                   |
| With partner and kids                                | Ref                      | 0.14                                  | 0.02, 1.11        | 0.67                                     | 0.42, 1.05        |
| Alone with or without kids                           | Ref                      | <b>2.19</b>                           | <b>1.03, 4.66</b> | 1.26                                     | 0.82, 1.94        |
| Body mass index (ref = normal weight) <sup>c,d</sup> | Ref                      |                                       |                   |                                          |                   |
| Overweight                                           | Ref                      | 0.61                                  | 0.30, 1.25        | 0.83                                     | 0.60, 1.14        |
| Obese                                                | Ref                      | 1.35                                  | 0.60, 3.07        | 0.78                                     | 0.51, 1.19        |
| Smoking (ref = never)                                | Ref                      |                                       |                   |                                          |                   |
| Current                                              | Ref                      | 0.59                                  | 0.23, 1.52        | <b>0.47</b>                              | <b>0.30, 0.73</b> |
| Former                                               | Ref                      | 1.04                                  | 0.46, 2.36        | 1.18                                     | 0.80, 1.74        |
| Tumour stage (ref = Ta)                              | Ref                      |                                       |                   |                                          |                   |
| Tis or T1                                            | Ref                      | 1.08                                  | 0.52, 2.21        | 1.17                                     | 0.84, 1.62        |
| Comorbidities (ref = 0)                              | Ref                      |                                       |                   |                                          |                   |
| 1                                                    | Ref                      | 0.87                                  | 0.32, 2.37        | 0.63                                     | 0.39, 1.01        |
| ≥2                                                   | Ref                      | 0.53                                  | 0.21, 1.37        | <b>0.63</b>                              | <b>0.41, 0.98</b> |

Abbreviations: CI, confidence interval; ref, reference; OR, odds ratio.

<sup>a</sup> Bold indicates significant results ( $p < 0.05$ ).

<sup>b</sup> Low: primary, secondary, and vocational education, medium: intermediate vocational education and higher general secondary education, high: higher vocational education and university.

<sup>c</sup> Normal weight: body mass index  $<24.9$  kg/m<sup>2</sup>, overweight: body mass index 25.0–29.9 kg/m<sup>2</sup>, obese: body mass index  $\geq 30.0$  kg/m<sup>2</sup>.

<sup>d</sup> n=8 participants were included with body mass index  $<18.5$  kg/m<sup>2</sup>.



**Table S6.** Multivariable multinomial logistic regression of correlates of dietary fibre intake trajectories (n=949)

| Correlates                                           | Medium maintainers<br>n=518 | High decreaseers<br>n=152 <sup>a</sup> |                   |
|------------------------------------------------------|-----------------------------|----------------------------------------|-------------------|
|                                                      |                             | OR                                     | 95% CI            |
| Age (ref = 65+)                                      | Ref                         | 1.16                                   | 0.70, 1.92        |
| Gender (ref = male)                                  | Ref                         | <b>0.40</b>                            | <b>0.21, 0.78</b> |
| Education (ref = low) <sup>b</sup>                   |                             |                                        |                   |
| Medium                                               | Ref                         | 1.44                                   | 0.87, 2.38        |
| High                                                 | Ref                         | 1.12                                   | 0.66, 1.90        |
| Living situation (ref = with partner)                |                             |                                        |                   |
| With partner and kids                                | Ref                         | 0.93                                   | 0.46, 1.89        |
| Alone with or without kids                           | Ref                         | 1.43                                   | 0.80, 2.57        |
| Body mass index (ref = normal weight) <sup>c,d</sup> |                             |                                        |                   |
| Overweight                                           | Ref                         | 0.51                                   | 0.32, 0.81        |
| Obese                                                | Ref                         | 0.85                                   | 0.47, 1.54        |
| Smoking (ref = never)                                |                             |                                        |                   |
| Current                                              | Ref                         | 0.57                                   | 0.30, 1.09        |
| Former                                               | Ref                         | 0.64                                   | 0.38, 1.09        |
| Tumour stage (ref = Ta)                              |                             |                                        |                   |
| Tis or T1                                            | Ref                         | 0.89                                   | 0.54, 1.47        |
| Comorbidities (ref = 0)                              |                             |                                        |                   |
| 1                                                    | Ref                         | 1.26                                   | 0.64, 2.50        |
| ≥2                                                   | Ref                         | 1.87                                   | 0.92, 3.78        |

Abbreviations: CI, confidence interval; ref, reference; OR, odds ratio.

<sup>a</sup> Bold indicates significant results ( $p < 0.05$ ).

<sup>b</sup> Low: primary, secondary, and vocational education, medium: intermediate vocational education and higher general secondary education, high: higher vocational education and university.

<sup>c</sup> Normal weight: body mass index  $<24.9$  kg/m<sup>2</sup>, overweight: body mass index 25.0–29.9 kg/m<sup>2</sup>, obese: body mass index  $\geq 30.0$  kg/m<sup>2</sup>.

<sup>d</sup> n=8 participants were included with body mass index  $<18.5$  kg/m<sup>2</sup>.

**Table S7.** Multivariable multinomial logistic regression of correlates of ultra-processed food intake trajectories (n=949)

| Correlates                                           | High increasers<br>n=83 | Medium increasers<br>n=866 <sup>a</sup> |                   |
|------------------------------------------------------|-------------------------|-----------------------------------------|-------------------|
|                                                      |                         | OR                                      | 95% CI            |
| Age (ref = 65+)                                      | Ref                     | 0.88                                    | 0.52, 1.51        |
| Gender (ref = male)                                  | Ref                     | 1.01                                    | 0.57, 1.80        |
| Education (ref = low) <sup>b</sup>                   | Ref                     |                                         |                   |
| Medium                                               | Ref                     | 1.05                                    | 0.59, 1.87        |
| High                                                 | Ref                     | 0.72                                    | 0.41, 1.25        |
| Living situation (ref = with partner)                | Ref                     |                                         |                   |
| With partner and kids                                | Ref                     | 0.75                                    | 0.36, 1.56        |
| Alone with or without kids                           | Ref                     | 0.58                                    | 0.32, 1.05        |
| Body mass index (ref = normal weight) <sup>c,d</sup> | Ref                     |                                         |                   |
| Overweight                                           | Ref                     | 1.33                                    | 0.80, 2.22        |
| Obese                                                | Ref                     | 1.30                                    | 0.66, 2.56        |
| Smoking (ref = never)                                | Ref                     |                                         |                   |
| Current                                              | Ref                     | <b>0.41</b>                             | <b>0.19, 0.85</b> |
| Former                                               | Ref                     | 0.80                                    | 0.40, 1.62        |
| Tumour stage (ref = Ta)                              | Ref                     |                                         |                   |
| Tis or T1                                            | Ref                     | 0.91                                    | 0.54, 1.55        |
| Comorbidities (ref = 0)                              | Ref                     |                                         |                   |
| 1                                                    | Ref                     | 0.76                                    | 0.34, 1.68        |
| ≥2                                                   | Ref                     | 0.67                                    | 0.32, 1.39        |

Abbreviations: CI, confidence interval; ref, reference; OR, odds ratio.

<sup>a</sup> Bold indicates significant results ( $p < 0.05$ ).

<sup>b</sup> Low: primary, secondary, and vocational education, medium: intermediate vocational education and higher general secondary education, high: higher vocational education and university.

<sup>c</sup> Normal weight: body mass index  $<24.9$  kg/m<sup>2</sup>, overweight: body mass index 25.0–29.9 kg/m<sup>2</sup>, obese: body mass index  $\geq 30.0$  kg/m<sup>2</sup>.

<sup>d</sup> n=8 participants were included with body mass index  $<18.5$  kg/m<sup>2</sup>.

**Table S8.** Multivariable multinomial logistic regression of correlates of red and processed meat intake trajectories (n=949)

| Correlates                                           | High decreaseers<br>n=134 | Medium maintainers<br>n=776 <sup>a</sup> |                   | Low maintainers<br>n=49 <sup>a</sup> |                    |
|------------------------------------------------------|---------------------------|------------------------------------------|-------------------|--------------------------------------|--------------------|
|                                                      |                           | OR                                       | 95% CI            | OR                                   | 95% CI             |
| Age (ref = 65+)                                      | Ref                       | 1.03                                     | 0.65, 1.64        | 0.65                                 | 0.27, 1.58         |
| Gender (ref = male)                                  | Ref                       | <b>3.14</b>                              | <b>1.66, 5.93</b> | <b>7.32</b>                          | <b>2.97, 18.08</b> |
| Education (ref = low) <sup>b</sup>                   |                           |                                          |                   |                                      |                    |
| Medium                                               | Ref                       | 1.45                                     | 0.93, 2.27        | 0.85                                 | 0.30, 2.39         |
| High                                                 | Ref                       | <b>3.43</b>                              | <b>1.87, 6.30</b> | <b>6.70</b>                          | <b>2.71, 16.58</b> |
| Living situation (ref = with partner)                |                           |                                          |                   |                                      |                    |
| With partner and kids                                | Ref                       | 0.93                                     | 0.48, 1.77        | 1.43                                 | 0.42, 4.86         |
| Alone with or without kids                           | Ref                       | 1.26                                     | 0.68, 2.35        | <b>3.02</b>                          | <b>1.20, 7.59</b>  |
| Body mass index (ref = normal weight) <sup>c,d</sup> |                           |                                          |                   |                                      |                    |
| Overweight                                           | Ref                       | 0.82                                     | 0.52, 1.29        | <b>0.29</b>                          | <b>0.12, 0.66</b>  |
| Obese                                                | Ref                       | 0.59                                     | 0.34, 1.02        | <b>0.31</b>                          | <b>0.11, 0.88</b>  |
| Smoking (ref = never)                                |                           |                                          |                   |                                      |                    |
| Current                                              | Ref                       | 0.42                                     | 0.22, 0.82        | <b>0.13</b>                          | <b>0.04, 0.42</b>  |
| Former                                               | Ref                       | 0.77                                     | 0.41, 1.44        | 0.46                                 | 0.18, 1.14         |
| Tumour stage (ref = Ta)                              |                           |                                          |                   |                                      |                    |
| Tis or T1                                            | Ref                       | 0.84                                     | 0.54, 1.30        | 0.59                                 | 0.25, 1.41         |
| Comorbidities (ref = 0)                              |                           |                                          |                   |                                      |                    |
| 1                                                    | Ref                       | 1.09                                     | 0.58, 2.06        | 0.79                                 | 0.25, 2.50         |
| ≥2                                                   | Ref                       | 1.07                                     | 0.60, 1.90        | 1.04                                 | 0.38, 2.88         |

Abbreviations: CI, confidence interval; ref, reference; OR, odds ratio.

<sup>a</sup> Bold indicates significant results ( $p < 0.05$ ).

<sup>b</sup> Low: primary, secondary, and vocational education, medium: intermediate vocational education and higher general secondary education, high: higher vocational education and university.

<sup>c</sup> Normal weight: body mass index  $<24.9$  kg/m<sup>2</sup>, overweight: body mass index 25.0–29.9 kg/m<sup>2</sup>, obese: body mass index  $\geq 30.0$  kg/m<sup>2</sup>.

<sup>d</sup> n=8 participants were included with body mass index  $<18.5$  kg/m<sup>2</sup>.

**Table S9.** Multivariable multinomial logistic regression of correlates of sugary drink intake trajectories (n=949)

| Correlates                                           | High decrease<br>n=548 | Medium decrease<br>n=59 <sup>a</sup> |                   | Low increase<br>n=342 <sup>a</sup> |                   |
|------------------------------------------------------|------------------------|--------------------------------------|-------------------|------------------------------------|-------------------|
|                                                      |                        | OR                                   | 95% CI            | OR                                 | 95% CI            |
| Age (ref = 65+)                                      | Ref                    | <b>1.90</b>                          | <b>1.04, 3.47</b> | <b>0.64</b>                        | <b>0.45, 0.90</b> |
| Gender (ref = male)                                  | Ref                    | 1.06                                 | 0.51, 2.18        | <b>1.87</b>                        | <b>1.32, 2.65</b> |
| Education (ref = low) <sup>b</sup>                   | Ref                    |                                      |                   |                                    |                   |
| Medium                                               | Ref                    | 0.99                                 | 0.52, 1.88        | <b>1.45</b>                        | <b>1.03, 2.04</b> |
| High                                                 | Ref                    | 0.47                                 | 0.21, 1.04        | 1.03                               | 0.72, 1.47        |
| Living situation (ref = with partner)                | Ref                    |                                      |                   |                                    |                   |
| With partner and kids                                | Ref                    | 0.68                                 | 0.29, 1.62        | 0.96                               | 0.59, 1.55        |
| Alone with or without kids                           | Ref                    | 1.08                                 | 0.50, 2.37        | 0.81                               | 0.54, 1.24        |
| Body mass index (ref = normal weight) <sup>c,d</sup> | Ref                    |                                      |                   |                                    |                   |
| Overweight                                           | Ref                    | 1.37                                 | 0.70, 2.67        | 0.81                               | 0.59, 1.11        |
| Obese                                                | Ref                    | 1.84                                 | 0.82, 4.14        | 0.87                               | 0.58, 1.32        |
| Smoking (ref = never)                                | Ref                    |                                      |                   |                                    |                   |
| Current                                              | Ref                    | 0.89                                 | 0.38, 2.11        | 1.15                               | 0.73, 1.82        |
| Former                                               | Ref                    | 0.95                                 | 0.45, 2.00        | 1.32                               | 0.89, 1.95        |
| Tumour stage (ref = Ta)                              | Ref                    |                                      |                   |                                    |                   |
| Tis or T1                                            | Ref                    | <b>1.89</b>                          | <b>1.06, 3.36</b> | 0.89                               | 0.64, 1.25        |
| Comorbidities (ref = 0)                              | Ref                    |                                      |                   |                                    |                   |
| 1                                                    | Ref                    | 0.68                                 | 0.29, 1.61        | 1.18                               | 0.74, 1.88        |
| ≥2                                                   | Ref                    | 0.77                                 | 0.37, 1.62        | 1.08                               | 0.71, 1.65        |

Abbreviations: CI, confidence interval; ref, reference; OR, odds ratio.

<sup>a</sup> Bold indicates significant results (p < 0.05).

<sup>b</sup> Low: primary, secondary, and vocational education, medium: intermediate vocational education and higher general secondary education, high: higher vocational education and university.

<sup>c</sup> Normal weight: body mass index <24.9 kg/m<sup>2</sup>, overweight: body mass index 25.0–29.9 kg/m<sup>2</sup>, obese: body mass index ≥30.0 kg/m<sup>2</sup>.

<sup>d</sup> n=8 participants were included with body mass index <18.5 kg/m<sup>2</sup>.

**Table S10.** Multivariable multinomial logistic regression of correlates of alcohol intake trajectories (n=949)

| Correlates                                           | High decreaseers | Low maintainers    |                   | Medium decreaseers |                   | Stable non-consumers |                   |
|------------------------------------------------------|------------------|--------------------|-------------------|--------------------|-------------------|----------------------|-------------------|
|                                                      | n=518            | n=152 <sup>a</sup> |                   | n=168 <sup>a</sup> |                   | n=111 <sup>a</sup>   |                   |
|                                                      |                  | OR                 | 95% CI            | OR                 | 95% CI            | OR                   | 95% CI            |
| Age (ref = 65+)                                      | Ref              | 1.06               | 0.68, 1.66        | 0.89               | 0.58, 1.37        | 0.96                 | 0.57, 1.61        |
| Gender (ref = male)                                  | Ref              | <b>2.56</b>        | <b>1.65, 3.98</b> | 0.90               | 0.54, 1.52        | <b>3.09</b>          | <b>1.90, 5.02</b> |
| Education (ref = low) <sup>b</sup>                   |                  |                    |                   |                    |                   |                      |                   |
| Medium                                               | Ref              | 0.95               | 0.60, 1.49        | 0.91               | 0.59, 1.41        | 0.86                 | 0.51, 1.46        |
| High                                                 | Ref              | 0.61               | 0.37, 1.01        | 0.77               | 0.49, 1.19        | <b>0.53</b>          | <b>0.29, 0.96</b> |
| Living situation (ref = with partner)                |                  |                    |                   |                    |                   |                      |                   |
| With partner and kids                                | Ref              | 1.37               | 0.76, 2.46        | 0.74               | 0.39, 1.42        | 1.29                 | 0.62, 2.66        |
| Alone with or without kids                           | Ref              | 1.09               | 0.62, 1.91        | 0.81               | 0.47, 1.42        | 1.76                 | 1.00, 3.08        |
| Body mass index (ref = normal weight) <sup>c,d</sup> |                  |                    |                   |                    |                   |                      |                   |
| Overweight                                           | Ref              | 1.21               | 0.78, 1.88        | 1.00               | 0.68, 1.49        | 0.98                 | 0.59, 1.63        |
| Obese                                                | Ref              | <b>1.93</b>        | <b>1.12, 3.32</b> | 1.03               | 0.59, 1.79        | 1.64                 | 0.89, 3.02        |
| Smoking (ref = never)                                |                  |                    |                   |                    |                   |                      |                   |
| Current                                              | Ref              | 0.62               | 0.34, 1.11        | 1.19               | 0.67, 2.10        | 1.15                 | 0.60, 2.21        |
| Former                                               | Ref              | <b>0.57</b>        | <b>0.35, 0.92</b> | 0.80               | 0.49, 1.31        | 0.58                 | 0.32, 1.05        |
| Tumour stage (ref = Ta)                              |                  |                    |                   |                    |                   |                      |                   |
| Tis or T1                                            | Ref              | 0.83               | 0.53, 1.33        | <b>1.49</b>        | <b>1.01, 2.20</b> | 1.09                 | 0.65, 1.83        |
| Comorbidities (ref = 0)                              |                  |                    |                   |                    |                   |                      |                   |
| 1                                                    | Ref              | 0.74               | 0.40, 1.35        | 0.87               | 0.49, 1.54        | 1.57                 | 0.70, 3.50        |
| ≥2                                                   | Ref              | 0.86               | 0.51, 1.47        | 0.99               | 0.59, 1.67        | 1.77                 | 0.84, 3.72        |

Abbreviations: CI, confidence interval; ref, reference; OR, odds ratio.

<sup>a</sup> Bold indicates significant results (p < 0.05).<sup>b</sup> Low: primary, secondary, and vocational education, medium: intermediate vocational education and higher general secondary education, high: higher vocational education and university.<sup>c</sup> Normal weight: body mass index <24.9 kg/m<sup>2</sup>, overweight: body mass index 25.0–29.9 kg/m<sup>2</sup>, obese: body mass index ≥30.0 kg/m<sup>2</sup>.<sup>d</sup> n=8 participants were included with body mass index <18.5 kg/m<sup>2</sup>.

**Table S11.** Changes in lifestyle behaviours in the first fifteen months after diagnosis in patients with full data at all three time points

| Lifestyle behaviours                 | n   | 3 months after        |                        | 15 months after        |  | Change <sup>b</sup> | Effect size <sup>b,c</sup> | P trend <sup>d</sup> |
|--------------------------------------|-----|-----------------------|------------------------|------------------------|--|---------------------|----------------------------|----------------------|
|                                      |     | Baseline <sup>a</sup> | diagnosis <sup>a</sup> | diagnosis <sup>a</sup> |  |                     |                            |                      |
| WCRF/AICR score                      | 737 | 3.3 (3.2, 3.4)        | 3.2 (3.1, 3.3)         | 3.3 (3.2, 3.3)         |  | 0.0 (-0.1, 0.0)     | -0.06 (-0.18, -0.05)       | 0.90                 |
| Body mass index (kg/m <sup>2</sup> ) | 814 | 26.9 (26.6, 27.2)     | 27.0 (26.7, 27.3)      | 26.9 (26.6, 27.2)      |  | 0.0 (-0.1, 0.1)     | 0.09 (-0.24, 0.12)         | 0.68                 |
| Physical activity (min/week)         | 784 | 742 (695, 789)        | 627 (580, 673)         | 647 (603, 690)         |  | -96 (-148, -43)     | -0.23 (-0.33, -0.12)       | <0.01                |
| Fruit & vegetables (g/day)           | 795 | 267 (257, 277)        | 226 (216, 235)         | 228 (218, 237)         |  | -39 (-51, -28)      | -0.49 (-0.61, -0.37)       | <0.001               |
| Dietary fibre (g/day)                | 795 | 22.8 (22.3, 23.3)     | 21.7 (21.2, 22.3)      | 21.4 (20.9, 21.9)      |  | -1.4 (-2.0, -0.9)   | -0.35 (-0.46, -0.24)       | <0.001               |
| Ultra-processed foods (en%)          | 795 | 32 (31, 32)           | 34 (34, 35)            | 34 (33, 35)            |  | 2.3 (1.5, 3.1)      | 0.41 (0.30, -0.53)         | <0.001               |
| Red & processed meat (g/week)        | 795 | 695 (671, 719)        | 629 (606, 653)         | 603 (580, 626)         |  | -92 (-118, -66)     | -0.48 (-0.59, -0.36)       | <0.001               |
| Sugary drinks (g/day)                | 795 | 214 (194, 235)        | 204 (184, 224)         | 184 (166, 203)         |  | -30 (-53, -7.3)     | -0.16 (0.26, 0.06)         | <0.01                |
| Alcohol (g/day)                      | 795 | 16.5 (15.2, 17.8)     | 14.4 (13.2, 15.7)      | 14.1 (12.9, 15.3)      |  | -2.4 (-3.4, -1.4)   | -0.29 (-0.38, -0.18)       | <0.001               |
| Current smokers (%)                  | 817 | 22.0 (19.2, 24.9)     | 14.7 (12.3, 17.1)      | 14.9 (12.5, 17.4)      |  | -7.1 (-11.9, -4.2)  | -0.41 (-0.63, -0.19)       | <0.01                |

Abbreviations: g, grams; kg, kilograms; m, meters; min, minutes; WCRF/AICR World Cancer Research Fund/American Institute of Cancer Research.

<sup>a</sup> Estimated marginal means (95% CI).

<sup>b</sup> Fifteen months after diagnosis – baseline.

<sup>c</sup> Effect size (*d*) of 0.20 is considered a small effect size, 0.50 is a moderate effect size, 0.80 is a large effect size.

<sup>d</sup> P for trend values were based on the linear mixed models with three repeated measures and time (continuous). For smoking, we used a logistic mixed model.

**Table S12.** Changes in lifestyle behaviours in the first fifteen months after diagnosis after excluding observations where extreme energy or dietary intakes<sup>a</sup> were reported

| Lifestyle behaviours        | n   | Baseline <sup>b</sup> | 3 months after         | 15 months after        | Change <sup>c</sup> | Effect size <sup>c,d</sup> | P trend <sup>e</sup> |
|-----------------------------|-----|-----------------------|------------------------|------------------------|---------------------|----------------------------|----------------------|
|                             |     |                       | diagnosis <sup>b</sup> | diagnosis <sup>b</sup> |                     |                            |                      |
| WCRF/AICR score             | 867 | 3.3 (3.2, 3.3)        | 3.2 (3.1, 3.3)         | 3.3 (3.2, 3.3)         | 0.0 (-0.1, 0.0)     | -0.04 (-0.16, 0.07)        | 0.85                 |
| Fruit & vegetables (g/d)    | 891 | 254 (246, 263)        | 219 (211, 228)         | 219 (210, 227)         | -36 (-45, -26)      | -0.49 (-0.59, -0.38)       | <0.001               |
| Dietary fibre (g/d)         | 891 | 22.0 (21.6, 22.5)     | 21.2 (20.8, 21.7)      | 20.9 (20.4, 21.3)      | -1.2 (-1.6, -0.7)   | -0.34 (-0.46, -0.23)       | <0.001               |
| Ultra-processed foods (en%) | 891 | 31.7 (31.1, 32.4)     | 34.5 (33.8, 35.1)      | 34.0 (33.3, 34.7)      | 2.2 (1.5, 3.0)      | 0.40 (0.29, 0.51)          | <0.001               |
| Red & processed meat (g/wk) | 891 | 667 (657, 698)        | 616 (596, 636)         | 589 (568, 609)         | -89 (-111, -66)     | -0.49 (-0.60, -0.39)       | <0.001               |
| Sugary drinks (g/d)         | 891 | 188 (174, 202)        | 172 (158, 186)         | 159 (146, 173)         | -29 (-45, -13)      | -0.22 (-0.32, -0.11)       | <0.001               |
| Alcohol (g/d)               | 891 | 14.3 (13.4, 15.3)     | 13.2 (12.3, 14.2)      | 12.5 (11.6, 13.4)      | -1.8 (-2.5, -1.1)   | -0.34 (-0.45, -0.23)       | <0.001               |

Abbreviations: g, grams; kg, kilograms; m, meters; min, minutes; WCRF/AICR World Cancer Research Fund/American Institute of Cancer Research.

<sup>a</sup> For energy intake: <500 or >3500 kcal/day for women, <800 or >4200 kcal/day for men and for dietary intake: ≥3 standard deviations from the mean.

<sup>b</sup> Estimated marginal means (95% CI).

<sup>c</sup> Fifteen months after diagnosis – baseline.

<sup>d</sup> Effect size (*d*) of 0.20 is considered a small effect size, 0.50 is a moderate effect size, 0.80 is a large effect size.

<sup>e</sup> P for trend values were based on the linear mixed models with three repeated measures and time (continuous).
